Anesthesiology

82:604, 1995

© 1995 American Society of Anesthesiologists, Inc.  
J. B. Lippincott Company, Philadelphia

## Measurement of Cerebral Blood Flow during Hypothermic Cardiopulmonary Bypass

*To the Editor:*—In our opinion, two related issues in the article by Ohsumi *et al.*<sup>1</sup> need to be addressed. The cerebral blood flows (CBF) and metabolic rates for oxygen (CMR<sub>O<sub>2</sub></sub>) they report using the Kety-Schmidt technique are appropriate and similar to reports by our laboratory<sup>2</sup> and that of Stephan *et al.*,<sup>3</sup> with the exception of the CBF (19 ml · 100 g<sup>-1</sup> · min<sup>-1</sup>) they document during hypothermic cardiopulmonary bypass. During hypothermia, the patients in the study were significantly hypocarbic (mean PaCO<sub>2</sub> = 29.7 mmHg). This degree of hypocarbia will decrease CBF by approximately 25–30% in the context of an opioid-benzodiazepine anesthesia.<sup>4,5</sup> Correcting for this hypocarbia, the CBF under normocarbic conditions (with alpha-stat management and hypothermia) would be closer to 25 ml · 100 g<sup>-1</sup> · min<sup>-1</sup>. This value is similar to what our laboratory<sup>2</sup> and that of Stephan *et al.*<sup>3</sup> reported.

Second, and more importantly, Ohsumi *et al.* sell the Kety-Schmidt method short when comparing their results to those previously obtained with <sup>133</sup>Xe clearance.<sup>6,7</sup> Ohsumi *et al.* suggest in their discussion that the CBF and CMR<sub>O<sub>2</sub></sub> values they report are too high when compared to values reported with the <sup>133</sup>Xe method. We would argue that the <sup>133</sup>Xe values typically reported are too low, and the Ohsumi *et al.* values are correct.<sup>2</sup> The Ohsumi *et al.* Kety-Schmidt-derived CBF and CMR<sub>O<sub>2</sub></sub> values are consistent with theoretical predictions and direct measurements in animals, unlike those commonly reported with <sup>133</sup>Xe.

**David J. Cook, M.D.**

Assistant Professor Anesthesiology

**John D. Michenfelder, M.D.**

Emeritus Professor of Anesthesiology

Mayo Medical School

Mayo Clinic

Rochester, Minnesota 55905

## References

1. Ohsumi H, Kitaguchi K, Nakajima T, Ohnishi Y, Kuro M: Internal jugular bulb blood velocity as a continuous indicator of cerebral blood flow during open heart surgery. *ANESTHESIOLOGY* 81:325–332, 1994
2. Cook DJ, Anderson RE, Michenfelder JD, Oliver WC Jr, Orszulak TA, Daly RC, Bryce RD: Cerebral blood flow during cardiac surgery: Comparison of the Kety-Schmidt and <sup>133</sup>Xe clearance methods. *Ann Thorac Surg* (in press)
3. Stephan H, Weyland A, Kazmaier S, Henze T, Menck S, Sonntag H: Acid-base management during hypothermic cardiopulmonary bypass does not affect cerebral metabolic but does affect blood flow and neurological outcome. *Br J Anaesth* 69:51–57, 1992
4. Forster A, Juge O, Morel D: Effects of midazolam on cerebral hemodynamics and cerebral vasomotor responsiveness to carbon dioxide. *J Cereb Blood Flow Metab* 3:246–249, 1983
5. McPherson RW, Traystman RJ: Fentanyl and cerebral vascular responsiveness in dogs. *ANESTHESIOLOGY* 60:180–186, 1984
6. Murkin JM, Farrar JK, Tweed WA, McKenzie FN, Guiraudon G: Cerebral autoregulation and flow/metabolism coupling during cardiopulmonary bypass: The influence of PaCO<sub>2</sub>. *Anesth Analg* 66:825–832, 1987
7. Croughwell N, Smith LR, Quill T, Newman M, Greeley W, Kern F, Lu J, Reves JG: The effect of temperature on cerebral metabolism and blood flow in adults during cardiopulmonary bypass. *J Thorac Cardiovasc Surg* 103:549–554, 1992

(Accepted for publication November 10, 1994.)
